# Supplementary material for: Vibrational entropy of disordering in omphacite
Source: PubMed Central journal article supplement (PMC10682307; doi:10.1007/s00269-023-01260-7), 2023-11-27

**Figure S2** XRD-results from the study “Vibrational entropy of disordering in omphacite” published by A. Benisek, E. Dachs, M. A. Carpenter, B. Joachim-Mrosko, N. M. Vielreicher, M. Wildner, in Physics and Chemistry of Minerals.

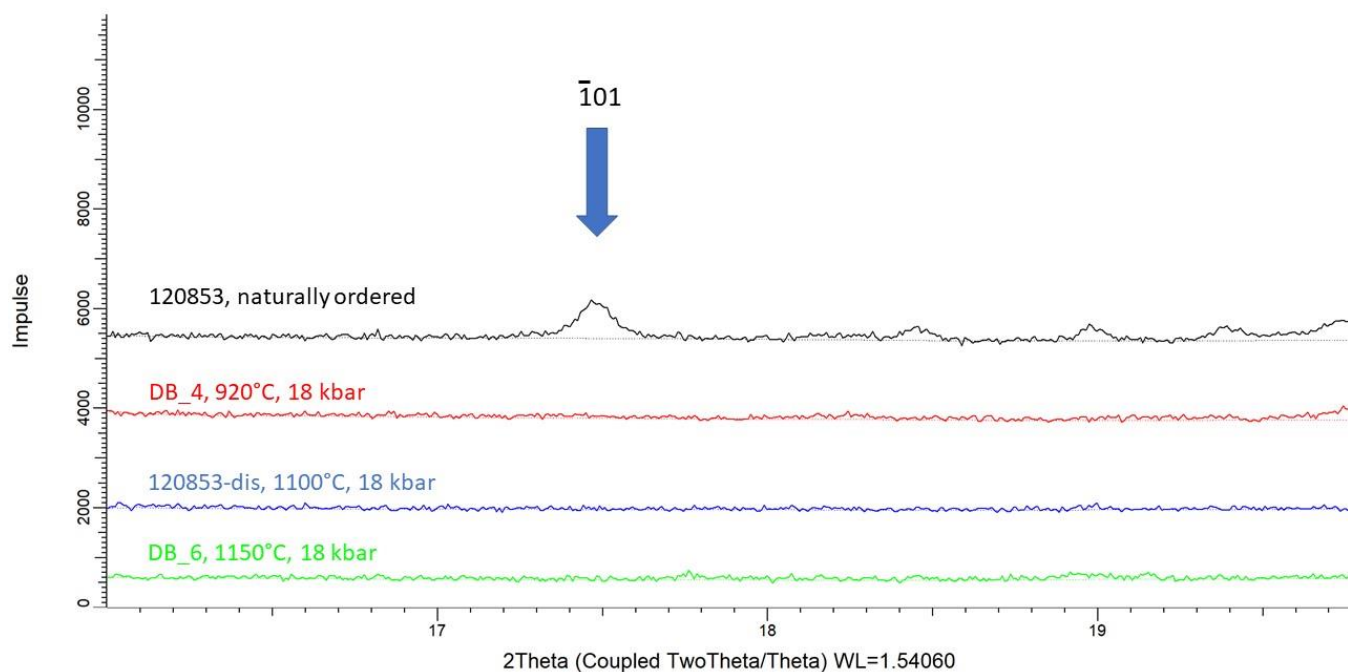

Supplement: 269_2023_1260_MOESM1_ESM.pdf [file 269_2023_1260_MOESM1_ESM.pdf]
